# Supplementary material
Source: publisher figshare collection journal article supplement (https://rs.figshare.com/ndownloader/files/42281648)
Supplement: Supplementary file 1 [file 42281648]

**Electronic Supplementary Material for “Arctic warming drives striking 21st century ecosystem shifts in Great Slave Lake (Subarctic Canada), North America’s deepest lake”**

Kathleen M. Rühland1, Marlene Evans2, and John P. Smol1

1Paleoecological Environmental Assessment and Research Lab (PEARL), Department of Biology, Queen’s University, 116 Barrie St., Kingston, ON, K7L 3N6, Canada

2Environment and Climate Change Canada, 867 Lakeshore Rd., Burlington, ON, L7S 1A1, Canada

**Corresponding Author**: Kathleen M. Rühland ([ruhlandk@queensu.ca](mailto:ruhlandk@queensu.ca))

**Table S1:** Selection of Great Slave Lake limnological data from various sources.

| Maximum Depth (m) | 163(1) – West Basin  614 – East Arm |
| --- | --- |
| Mean Depth (m) | 41(2) |
| GSL12 Coring Depth (m) | 69 |
| GSL19 Coring Depth (m) | 47 |
| GSL-13-94 Coring Depth (m) | 62 |
| Gros Cap Coring Depth (m) | 86 |
| Mixing Type | Dimictic |
| Average open water period (days) | 175(3) |
| Lake Area (km2) | 28, 568(4) |
| Drainage Basin Area (km2) | 949,000(5) |
| Drainage Basin Area:Lake Volume (m2m3) | 454 |
| Water Residence Time (yrs) | ~7.0 – West Basin(2)  ~16.0 – entire lake(2) |
| Slave River sediment discharge (kg y-1) | 2.64 to 6.72 x 1010 kg y-1 (6) |
| Open Water (avg. days) | 175(7) |
| Secchi Disk Depth (m) | ~2.5 – West Basin(2)  ~9.0 – East Arm(2) |
| Total Phosphorus (μg/L) | ~12.5 – West Basin(8)  8.8 – East Arm(2) |
| pH | ~8.0 |
| Mean Annual Primary Production (C mg-2 day-1) | 286(9) (2003-2018) |
| Summer Surface Water Temperature (°C) | 22.3 – West Basin(10) (2011-2016) |
| Summer Bottom Water Temperature (°C) | 3.5 – West Basin(10) (2011-2016) |
| Population living on shoreline | ~27,260 (~60% of NWT)(11) |

(1) Carmack and Vagle 2021; (2) Evans 2000; (3) Rouse et al. 2008a; (4) MRBB 2004; (5) Gibson et al. (2006); (6) Evans and Muir 2016; (7) Rouse et al. 2008b; (8) Fee et al. 1985; (9) Sayers et al. 2020; (10) Zhu et al. 2017; (11) Statistics Canada, January 2021

**References**

Carmack E, Vagle S 2021 Thermobaric Processes Both Drive and Constrain Seasonal Ventilation in Deep Great Slave Lake, Canada. *J. Geophys. Res.: Earth Surface* **126,** e2021JF006288. https://doi. org/10.1029/2021JF006288

Evans MS. 2000 The large lake ecosystems of northern Canada. *Aquat. Ecosyst. Health Manag*. **3**, 65-79, <https://doi.org/10.1080/14634980008656992>

**Electronic supplementary material S1**

*Stoermer et al. (1990) paleolimnological study of McLeod Bay, East Arm, GSL*

The first sedimentary diatom study of GSL was from a core collected in 1987 from McLeod Bay in the East Arm (Stoermer et al. 1990). Although interesting, there are great differences in the physical, chemical and hydrological characteristics between the West Basin and the East Arm (Mackenzie et al. 2022; electronic supplementary material figure S1below) and therefore comparisons of diatom trends with our study would be unsuitable. For example, the very deep, cold, clear and ultra-oligotrophic McLeod Bay (East Arm) is isolated from the main basin of GSL and receives inflow from drainage through bare Precambrian Shield bedrock with extremely low mineral content (Rawson 1950). In contrast, the West Basin is strongly influenced by riverine inflow (mainly from the Slave River but also from Hay and Taltson rivers) originating from southern watersheds situated on sedimentary bedrock of the Interior Plains physiographic region, resulting in warmer and more turbid and productive waters, with very high mineral content compared to the East Arm (Rawson 1950; Evans 2000). It is not surprising that diatom assemblage composition from our West Basin sediment records differ substantially to the McLeod Bay record, which was dominated by large centric *Lindavia bodanica* and a variety of benthic diatom taxa (Stoermer et al. 1990). Indeed, Rawson (1956) treated the very deep, clear, cold, and extremely oligotrophic McLeod and Christie bays as separate bodies of water compared to the turbid West Basin of GSL and found that phytoplankters (dominated by *Aulacoseira islandica*) in the West Basin of GSL were about 200 times as numerous than the deep bays of the East Arm. Stoermer et al. (1990) similarly noted that *Aulocoseira* taxa (including *A. islandica*) were only a minor component of the McLeod Bay diatom assemblages.

**Figure S1.** Google Earth image of Great Slave Lake showing location of the Stoermer et al. (1990) sediment coring site on McLeod Bay. This satellite image highlights the difference between the typically clear waters of the East Arm that is on Precambrian Shield bedrock and the turbid West Basin that is on sedimentary bedrock of the Interior Plains.

**References**

Evans MS. 2000 The large lake ecosystems of northern Canada. *Aquat. Ecosyst. Health Manag*. **3**, 65-79, <https://doi.org/10.1080/14634980008656992>

Mackenzie CJA, Fortin BL, Stevens CE. 2022 Summary of ecological information relevant to Great Slave Lake fisheries. Canadian Manuscript Report of Fisheries and Aquatic Sciences 3214: vii + 63 p.

Rawson DS. 1950. The physical limnology of Great Slave Lake. *J. Fish. Res. Board Can*. **8**, 3-66.

Rawson D S. 1956. The net plankton of Great Slave Lake. *J. Fish. Res. Board Can.* **13**, 53-127.

Stoermer EF, Schelske CL, Wolin JA. 1990 Siliceous Microfossil Succession in the Sediments of McLeod Bay, Great Slave Lake, Northwest Territories. *Can. J. Fish. Aquat. Sci*. **47**, 1865- 1874.

**Electronic supplementary material S2**

*Great Slave Lake site description*

The Slave River is formed by the confluence of the Peace and Athabasca rivers, whose headwaters originate in the mountain regions of Alberta and British Columbia to the west, and the Lake Athabasca watershed in northwestern Saskatchewan to the east. Through seiches and other circulation patterns, Slave River waters flow into the East Arm with Christie Bay having higher total dissolved solids (TDS) than McLeod Bay, with TDS being reflective of other factors influencing productivity including phosphorus, nitrogen, silica and essential mineral concentrations. Relative to other regions of GSL, the turbid West Basin with high sediment loading is the most productive (Rawson 1956). The Slave River also influences ice-off across that lake with ice-off first occurring in the West Basin near the mouth of the Slave River, with open water extending farther into the West Basin within a few weeks (see example from 2018 Landsat images in figure S2 below). The East Arm is typically the last part of the lake to be ice-free. In earlier surveys of GSL, thermal stratification in offshore waters generally did not develop until mid to late July (Rawson 1950).

**Figure S2.** Landsat images (courtesy of Homa Kheryollah) taken over Great Slave Lake during the onset of ice-off in May of 2018 showing the locations of the four sediment records from the West Basin. These images show the effect that the Slave River has on ice-off, with locations closer to the river (GSL19 and Gros Cap) being ice free before locations to the west (GSL12 and GSL-13-94).

**References**

Rawson DS. 1950. The physical limnology of Great Slave Lake. *J. Fish. Res. Board Can*. **8**, 3-66.

Rawson D S. 1956. The net plankton of Great Slave Lake. *J. Fish. Res. Board Can.* **13**, 53-127.

**Electronic supplementary material S3**

*The lack of countable diatoms in earlier sediments and differences in the onset of diatom accumulation in the four West Basin sediment cores.*

The four cores collected from the West Basin of GSL in 2014 (GSL12, GSL19) and in the 1990s (GSL-13-94, Gros Cap) lacked diatoms in countable numbers in the earlier sediments. However, there were substantial differences in the timing of the onset of diatom accumulation among these cores. The GSL12 core, located farthest from the Slave River (figure 1 in main text), registered countable algal remains since around the 19th century (figure 2a, main text), whereas cores retrieved closer to the Slave River registered a later onset of diatom accumulation (GSL13-94, ca. 1930s (figure 2c, main text); GSL19 (figure 2b, main text) and Gros Cap (figure 2d, main text), ca. late- 1960s to ca. 1970). Below we assess possible reasons for these differences.

**1)** *Diatom preservation*: Diatom records were short relative to the length of the sediment cores (figure 2a-d, main text). In all cores, the rare diatom valves that were encountered were well preserved in intervals where they were too scarce to count and there was no visible evidence of diatom dissolution. A lack of countable diatoms in earlier sediments, as we observed in GSL, is often reported in large, deep, ice-covered, high latitude lakes (e.g. Perren et al. 2003; Antoniades et al. 2007; Besonen et al. 2008; Lehnherr et al. 2018) including in a sediment record from the very deep and oligotrophic McLeod Bay in the East Arm of GSL (Stoermer et al. 1990). We rule out dissolution as an explanation for the lack of diatoms in earlier sediments and the differences in the timing of diatom onset among our West Basin cores. Similarly, Stoermer et al. (1990) found no evidence of downcore diatom dissolution in the earlier intervals of a sediment record collected in 1987 from McLeod Bay in the East Arm of GSL where diatoms were also rarely encountered.

**2)** *Radioisotopic dating*: We rule out that differences in the timing of diatom accumulation among cores is the result of 210Pb dating issues. For the 2014 cores (GSL12 and GSL19) comparisons were made in the dating results of replicate cores retrieved on the same day from the same coring location assessed at different laboratories (ECCC and PEARL). Cores show excellent correspondence between unsupported 210Pb and 137Cs curves (data not shown). Both 2014 and 1990 cores registered a pronounced increase in 137Cs that had excellent correspondence with CRS-estimated 210Pb dates for the 1963 height of atmospheric fallout from nuclear testing (electronic supplementary material figure S4A). Considering that there are always errors associated with radioisotopic dating, the results support the veracity of the dating chronologies of the four cores that were selected for our study.

**3)** *Ice phenology*: It is likely that changes in ice cover phenology played a key role in the 21st century diatom compositional changes observed in both West Basin cores collected in 2014 (GSL12 and GSL19) and for the onset of diatom accumulation in the core located farthest from the Slave River (GSL12). Using similar arguments to those used by other scientists, extensive ice-covers precluded much algal growth is the most likely explanation for the dearth of diatoms in these earlier sediments. The onset of diatom accumulation during the 19th century in GSL12 is consistent with warmer conditions at the end of the Little Ice age with longer and warmer ice-free periods together with reductions in water levels in the Slave River system, declines in river discharge (Ennis 2010; Wolfe et al. 2012) that would have improved diatom growing conditions in this offshore location of GSL.

However, differences in ice cover cannot explain the much later timing of diatom inception in sediment records from GSL19 and Gros Cap (ca. late 1960s to early 1970s) compared to GSL12 (prior to ca. 1850) and GSL13-94 (ca. 1930s to ca. 1940s). If differences in the onset of diatom accumulation were related strictly to variation in the timing of ice-off and ice-on among our West Basin sites, it would be expected that locations that are ice-free earlier would register diatom accumulation earlier. However, this is counter to what we report as both GSL19 and Gros Cap sediment records register diatoms much later, and their locations near the Slave River would ensure that ice-off occurs here earlier than GSL12 or GSL-13-94 (see electronic supplementary material figure S2). GSL19 and Gros Cap are located in regions of the West Basin where the inflow from the Slave River, particularly during spring, would result in these sites being ice-free earlier than offshore locations farther from the Slave River (i.e. GSL12). Therefore, the differences in the timing of diatom proliferation cannot be explained by spatial differences in ice-phenology across the West Basin of GSL.

**4*)*** *Change in Slave River flow regime and depositional environment: effects of climate change and regulation from Bennett Dam****:*** The Slave River has long been an important influence on the physical and chemical limnology of the West Basin of GSL, as it is the main source of water and delivers massive amounts of suspended sediment to the lake. Prior to the construction and operation of the W.A.C. Bennett dam (construction began 1963, operating since 1968, infilling completed 1972), average Slave River flow rates for January-March ranged from 1,200-1,800 m3/sec versus 2,000 m3/sec for the post construction period while June-July flow decreased from 7,000 m3/sec during the preconstruction to 4,700-4,800 m3/sec in the postconstruction period. This change in seasonal flow had many impacts on aquatic environments including a reduction in the spring flooding of the Peace Athabasca delta with more subtle effects on water level in GSL (Peters and Prowse 2001, Gibson et al. 2006). Impacts on plume dynamics and water clarity are unknown. In addition to its large water flow, the Slave River is also a major contributor of suspended sediment to the West Basin of GSL. Suspended sediment load is difficult to measure during periods of ice formation and breakup and so estimates are imprecise and vary from year to year with variations in flow rate, the nature of ice breakup, and the erosion processes which contribute to this load. There is evidence that the alterations to hydrological flow (post-impoundment period) affected suspended sediment load at Fort Fitzgerald on the Slave River. Mean annual suspended sediment load decreased by 33% (by approxi­mately 372,500 tonne/y); moreover suspended sediment load has increased 314% (from approximately 57,100 to 179,900 tonne/y) during the ice-on period (November to April) but decreased 46% (from approximately 1,077,600 to 582,300 tonne/y) in the ice-free period (May-October) (English et al. 1997). Since the Slave River sediment load greatly affects water clarity, particularly at sites located closer to the river (Rawson 1956; Evans et al. 1996, Evans 2000), dam construction should have resulted in an improvement in summer water clarity particularly in the deeper offshore regions of the lake where sediment resuspension would be less important.

Acknowledging the errors associated with estimated 210Pb dates, it is noteworthy that diatoms were first registered in the sedimentary record of GSL19 (ca. 1967) and Gros Cap (ca. 1967) at approximately the same time as the regulation of stream flow by the W.A.C. Bennett Dam (completed in 1968 and filled by 1971). We speculate that the onset of flow regulation of the Peace River (which is strongly connected to the Slave River) may have potentially changed the depositional patterns at these sites in the West Basin so that diatoms were able to grow and then accumulate in the bottom sediments of these locations at this time. In GSL, the circulation pattern is counter-clockwise around the lake and a large central basin counter-clockwise gyre that distributes suspended sediment from the Slave River in the upper water layers of the West Basin (León et al. 2005; Rouse et al. 2008a,b). With the hydrological regulation of the Peace River (northern British Columbia) after the construction and infilling of the W.A.C. Bennett Dam (1967-1971), there was an overall reduction in sediment discharge from the Slave River into the West Basin of GSL (English 1997) that could have changed the positioning of internal circulation patterns in this large basin. For example, discharge from the Slave River into GSL has increased during the winter (including total phosphorus; Glozier et al. 2009) and decreased during the spring and summer (Gibson et al. 2006), that is suggested to have decreased overall sediment yields (English et al. 1997).

In addition, the Slave River inflow and the water balance of GSL are largely dependent on precipitation and runoff in the Peace-Athabasca Basin, even after initiation of hydrological regulation (Gibson et al. 2006; Brock et al. 2010; Sanderson et al. 2012). For example, analysis of an 80-year-long lake sediment record from a Slave delta lake determined that declines in precipitation and snowpack from the 1960s to the 1980s resulted in reductions in the runoff regime in the Upper Mackenzie River Basin that pre-date the upstream regulation of the Peace River by the Bennett Dam (Brock et al. 2010). Collectively, climate change and hydrological regulation of the Peace River since the middle of the 20th has altered the Slave River inflow to GSL and may have increased sediment and nutrient transport (Rawlins et al. 2009), turbidity (MRBB 2004; Zhu et al. 2017), as well the direction of flow and sediment delivery (Brock et al. 2010). The reduction in spring/summer flow and sediment yield would likely have weakened the extent of the sediment plume into the offshore regions of the West Basin, leading to overall increased summer water clarity. The two coring locations (GSL19 and Gros Cap) that are closest to the Slave River would have been most affected by this change in water clarity and flow regime resulting from collective effects of both climate change and the Bennett Dam. A shift in sediment delivery at the coring locations may be a plausible explanation why diatoms only began to accumulate in the GSL19 and Gros Cap sediment records in the late 1960s. Although speculative, our reasoning aligns with the findings of Brock et al. (2010), who examined aerial photographs from 1950s onwards that depict a change in flow direction from westward through the Slave Delta to now northward that is particularly evident between the 1955 and 1966 aerial photographs.

Diatoms first accumulated in countable abundances in the GSL-13-94 sediment record a few decades earlier (ca. 1930s) than in the GSL19 and Gros Cap cores, which pre-dates hydrological regulation by the Bennett Dam. GSL-13-94 is located between the farthest site from the Slave River (GSL12) and the two coring sites (GSL19 and Gros Cap) that are closest to the river, and so the timing of significant diatom accumulation at this site may be related to its intermediate location relative to the Slave River and hence a more moderate influence of suspended sediments into the West Basin compared to Gros Cap and GSL19 (see satellite images in figure S3below). It is difficult to ascertain why the onset of diatom accumulation in the GSL-13-94 record was later than GSL12, but it may also be related to their locations within the West Basin, distance from the sediment plume, and dominant circulation patterns that could have been altered by climate-related changes to the Slave River flow, affecting sediment delivery at the coring sites.

**Figure S3:** Satellite images of Great Slave Lake and sediment core locations in the West Basin, highlighting the influence of suspended sediment from the Slave River. Note that 2020 was an exceptionally wet spring and had the highest water levels on record for all major rivers feeding GSL (govt.ca/hydrological_analysis_for_0_final_report_2021-01-28). This resulted in an exceptional extent and distribution of the Slave River sediment plume (captured in lower two images taken in 2020). The comparison of images from 2020 with more typical conditions in 2022 emphasize how weather/climate can be an important factor in the extent and distribution of Slave River sediment into the West Basin – even with flow controls on the Peace and Slave rivers by the Bennett Dam.

Images: Sentinel-3-OLCI Sensor from the Sentinel Hub, European Space Agency.

**References**

Antoniades D, Crawley C, Douglas MSV, Pienitz R, Andersen D, Doran PT, Hawes I, Pollard W, Vincent WF. 2007 Abrupt environmental change in Canada’s northernmost lake inferred from fossil diatom and pigment stratigraphy. *Geophys. Res. Lett.* **34**,L18708.

Besonen MR, Patridge W, Bradley RS, Francus P, Stoner JS, Abbott MB. 2008 A record of climate over the last millennium based on varved lake sediments from the Canadian High Arctic. *Holocene* **18**,169–180.

Brock BE, Martin ME, Mongeon CL, Sokal MA, Wesche SD, Armitage D, Wolfe BB, Hall RI, Edwards TWD. 2010 Flood frequency variability during the past 80 years in the Slave River Delta, NWT, as determined from multi-proxy paleolimnological analysis. *Can. Wat. Res. J.* **35**, 281-300, <https://doi.org/10.4296/cwrj3503281>

English MC, Hill RB, Stone MA, Ormson R. 1997 Geomorphological and botanical change on the outer Slave River delta, NWT, before and after impoundment of the Peace River. *Hydrol. Proc.* **11**, 1707−1724.

Ennis M. 2010 Paleolimnological reconstruction of hydrologic change in the Slave River and Great Slave Lake during the past millennium. Thesis and Dissertations (Comprehensive). 1013. <http://scholars.wlu.ca/etd/1013>

Evans MS. 2000 The large lake ecosystems of northern Canada. *Aquat. Ecosyst. Health Manag*. **3**, 65-79, <https://doi.org/10.1080/14634980008656992>

Evans M S, Bourbonniere RA, Muir D, Lockhart L, Wilkinson P, Billeck B. 1996 Depositional history of sediment in Great Slave Lake: Spatial and temporal patterns in geochronology, bulk paramerters, PAHs and chlorinated contaminants. Northern River Basin Study project report, ISSN 1192-3571; no. 99.

Gibson JJ, Prowse TD, Peters DL. 2006 Hydroclimatic controls on water balance and water level variability in Great Slave Lake. *Hydrol. Proc.* **20**, 4155-4172.

Glozier NE, Donald DB, Crosley RW, Halliwell D. 2009 Wood Buffalo National Park Water Quality: Status and Trends from 1989-2006 in Three Major Rivers: Athabasca, Peace and Slave. Environment Canada, Water Science and Technology Directorate, Water Quality Monitoring and Surveillance Division, Prairie and Northern Office, Saskatoon.

Lehnherr I et al. 2018 The world’s largest High Arctic lake responds rapidly to climate warming. *Nat. Comm*. https://DOI: 10.1038/s41467-018-03685-z.

León LF, Lam DCL, Schertzer WM, Swayne D. 2005 Lake and climate models linkage: a 3-D hydrodynamic contribution. *Adv Geosci* **3**,1-6.

Mackenzie River Basin Board (MRBB). 2004 Mackenzie River Basin State of the Aquatic Ecosystem Report 2003. Mackenzie River Basin Board Secretariat, Fort Smith, NWT. 213 pp.

Perren BB, Bradley RS, Francus P. 2003 Rapid lacustrine response to recent High Arctic warming: a diatom record from Sawtooth Lake, Ellesmere Island, Nunavut. *Arct. Antarct. Alp. Res*. **35**, 271–278.

Peters DL, Prowse TD. 2001 Regulation effects on the lower Peace River, Canada. *Hydrol. Proc*. **15**, 3181–3194.

Rawlins MA et al. 2009. Tracing freshwater anomalies through the air-land-ocean system: a case study from the Mackenzie River basin and the Beaufort Gyre. *Atmos. Ocean* **47**, 79-97.

Rawson D S. 1956. The net plankton of Great Slave Lake. *J. Fish. Res. Board Can.* **13**, 53-127.

Rouse WR, Blanken PD, Duguay CR, Oswald CJ, Schertzer WM. 2008a Climate-lake interactions. *In*: Cold Region Atmospheric and Hydrologic Studies: The Mackenzie GEWEX Experience, Volume 2: Hydrologic Processes (Ed. Woo, M.-K.), pp. 139-160, Springer-Verlag, Berlin.

Rouse WR, Blanken PD, Bussières N, Oswald CJ, Schertzer WM, Spence C, Walker,AE. 2008b An investigation of the thermal and energy balance regimes of Great Slave and Great Bear lakes. *J. Hydrometeorol*. **9**, 1318-1333. DOI: 10.1175/2008JHM977.1.

Sanderson J, Czarnecki A, Faria D. 2012 Report Summary: Slave River, Water and Suspended Sediment Quality of the Transboundary Reach of the Slave River, Northwest Territories. Aboriginal Affairs and Northern Development Canada. QS-Y376-000-EE-A1, Catalogue: R3-174/2012E, ISBN: 978-1-100-21539-6

Stoermer EF, Schelske CL, Wolin JA. 1990 Siliceous Microfossil Succession in the Sediments of McLeod Bay, Great Slave Lake, Northwest Territories. *Can. J. Fish. Aquat. Sci*. **47**, 1865- 1874.

Wolfe BB, Hall RI, Edwards TWD, Johnston JW. 2012 Developing temporal hydroecological perspectives to inform stewardship of a northern floodplain landscape subject to multiple stressors: paleolimnological investigations of the Peace-Athabasca Delta. *Environ. Rev*. **20**, 191-2010. doi:10.1139/A2012-008

Zhu X, Chapelsky A, Carmichael TJ, Leonard DL, Lea E, Tallman RF, Evans M,

Podemski C, and Low G. 2017 Establishment of baseline metrics for integrated ecomonitoring

cumulative impacts on Great Slave Lake fisheries ecosystem. *Can. Tech. Rpt. Fish. Aquat. Sci.*

**3223**, ix + 58 p.

**Electronic supplementary material S4**

*Sediment Core Retrieval*

The locations in the West Basin for the sediment cores retrieved in 2014 (GSL12, GSL19) for this study, were selected because these were the same sites that were previously cored in March 1994 as part of study investigating contaminant deposition in the West Basin (Evans et al. 1996). The 2014 sediment cores (GSL12, GSL19) were sectioned on site into intervals of 0.5 cm for the first 15 cm of the core, then into 1 cm intervals for the remainder of the cores. The sediment sections were placed into plastic Whirl-Pak® bags and kept cool before being transported to ECCC in Saskatoon where the samples were subsequently freeze-dried before being shipped to PEARL for analyses.

In March 1995, Environment and Climate Change Canada (ECCC) in collaboration with the Department of Fisheries and Oceans (DFO) retrieved sediment cores from five sites located offshore of the Slave River plume including Gros Cap (61.885 °N, 113.66528 °W; coring depth = 86 m), one of the archival cores selected for this study. Sites closer to the Slave River outflow were characterized by high sedimentation with some cores showing slumping, making it difficult to establish reliable chronologies and were therefore not selected for diatom analysis in this study. The coring location for our 1994 Gros Cap sediment record is near Rawson’s station no. 31 (Rawson 1956) where 8 consecutive years (1946-1954) of phytoplankton data were collected.

The second archival core used in this study (GSL-13-94: 61.40669 °N, 115.00028 °W; coring depth = 62 m) was retrieved by ECCC in March 1994 and is located in the central part of the West Basin between GSL12 and GSL19 (Figure 1, main text).

**References**

Evans M S, Bourbonniere RA, Muir D, Lockhart L, Wilkinson P, Billeck B. 1996 Depositional history of sediment in Great Slave Lake: Spatial and temporal patterns in geochronology, bulk paramerters, PAHs and chlorinated contaminants. Northern River Basin Study project report, ISSN 1192-3571; no. 99.

**Electronic supplementary material S5**

*Radioisotopic Dating*

*METHODS:* The two 2014 cores (GSL12, GSL19) were dated using gamma spectroscopy at PEARL, Queen’s University, Kingston, Ontario. Approximately 1.5 grams of freeze-dried sediment from ~20 selected sedimentary intervals from each core were placed into plastic tubes and sealed with 2-ton epoxy, following Schelske et al. (1994). Chronologies were estimated based on the constant rate of supply (CRS) model (Appleby 2001) executed through the ScienTissiME dating software (<http://www.scientissime.net/software>). Dating for the two cores retrieved in the 1990s (GSL-13-94 and Gros Cap) were undertaken by the Department of Fisheries and Oceans at the Freshwater Institute (Winnipeg, Manitoba) and was based on a linear model using a combination of alpha spectroscopy (for 210Pb activities) and gamma spectroscopy (for 137Cs activities) as described in Evans et al. (1996). For each core, total 210Pb and 137Cs activities were plotted with depth and the mean of 214Pb (2014 cores) and 226Ra (1990s cores) were used as proxies for background/supported 210Pb levels. For all sediment cores, a peak in 137Cs was used as an independent chronological marker for the 1963 maximum radioactive fallout from atmospheric testing of nuclear weapons (Appleby 2001).

*RESULTS:* Initial 210Pb concentrations ranged from ~120 Bq/Kg (Gros Cap) to ~350 Bq/Kg (GSL12) and generally followed an exponential decline with core depth (electronic supplementary material figure S4A a-d). Each core showed a well-defined peak in 137Cs activity with estimated 210Pb dates that had excellent correspondence with the 1963 height of nuclear weapons testing (GSL12, 7.25 cm = ca. 1959 ±5.3; GSL19, 6.75 cm = ca. 1962 ±9.5; GSL13-94, 3.0 cm = ca. 1966 (error estimates NA); Gros Cap, 7.75 cm = 1965 (error estimates NA). Comparison of sediment accumulation rates were lowest for GSL12 located farthest from the Slave River and higher for coring sites GSL19 and particularly, Gros Cap closer to the river (figure S4B).

**Figure S4A. Radiometric dating analysis for GSL sediment cores.** A-D: Total 210Pb (black circles) and 137Cs activities (grey circles) plotted against core depth for the Great Slave Lake sediment cores collected from the West Basin including (A) GSL12, (B) GSL19, (C) GSL-13-94, and (D) Gros Cap. The vertical dashed lines represent the mean background levels of supported 210Pb using proxies of 214Pb (GSL12, GSL19) and 226Ra (GSL-13-94, Gros Cap). The age-depth model (inset) are shown for each core with associated errors for GSL12 and GSL19. Dates for GSL12, GSL19 and Gros Cap were based on the constant rate of supply (CRS model). Dates for GSL-13-94 were based on a linear model (Evans et al. 1996). Peaks in 137Cs activity (circled samples) have excellent agreement with 210Pb dates for height of 1963 nuclear fallout. E-G: The log of unsupported 210Pb activities plotted against cumulative dry weight (and linear fit lines) for GSL12 (E), GSL19 (F), GSL-13-94 (G), and Gros Cap (F). Insets depict estimated age versus cumulative dry weight profiles with linear fit lines. Cores GSL12 and GSL19 collected in 2014 by EEEC and dated at PEARL. Cores GSL-13-94 and Gros Cap were collected and dated in 1994 and 1995 by EEEC.

**Figure S4B. Sediment accumulation rates based on 210Pb dating analysis for GSL sediment cores.** Comparison of sediment accumulation rates over time for sites GSL12 and GSL-13-94 (farthest from Slave River), and sites GSL19 and Gros Cap (closest to Slave River).

**References**

Appleby PG. 2001 Chronostratigraphic techniques in recent sediments. *In*: Last WM, Smol JP (eds) Tracking environmental change using lake sediments, basin analysis, coring, and chronological techniques, vol 1. Springer, Dordrecht, pp 171–203.

Schelske et al. (1994). Schelske CL, Peplow A, Brenner M, Spencer CN. 1994 Low-background counting: applications for 210Pb dating of sediments. *J. Paleolimnol.* **10**, 115-128.

**Electronic supplementary material S6**

*Subfossil Diatom Analyses*

METHODS: Sediment samples for the four cores were processed using PEARL methods (Rühland and Smol 2002). Approximately 0.5 grams of wet sediment from 26 selected intervals was placed into glass scintillation vials and then treated with a 50:50 molar mixture of nitric and sulfuric acids to digest the organic sediment matrix. The samples were placed into a hot water bath set to 80°C for at least two hours. The samples were removed and allowed to settle for approximately 24 hours. The samples were rinsed several times with deionized water until a neutral pH was achieved, allowing the diatoms to settle completely between rinses. To reduce the amount of siliciclastic material from the diatom slurries, each sample was shaken and then quickly decanted into a clean vial, leaving behind heavier grains. For several samples where this approach did not yield satisfactory results, a density gradient separation technique using sodium polytungstate (SPT) was used to remove excessive siliciclastic material and to concentrate diatom valves on the microscope slides (Tapia and Harwood, 2002). Small aliquots of the resulting slurries were strewn onto coverslips in different dilutions and allowed to evaporate before being mounted onto microscope slides with Naphrax®. Diatom enumeration was undertaken using a Leica DMRB light microscope fitted with differential interference optics at 1000X magnification. When feasible, 300 diatom valves were counted for each sedimentary interval; for deeper sediments where diatoms were less plentiful, at least 100 valves were counted. Counting effort was deemed impractical when only a few valves (albeit very well preserved)) were encountered in ~200 fields of view. Diatoms were identified to the lowest taxonomic level possible primarily using Krammer and Lange-Bertalot (1986-1991), Häkansson and Kling (2011), Tanaka (2007), and Reavie and Kireta (2015) as the main taxonomic sources. Diatom data were expressed as a percentage of the total number of valves counted in each interval. Principal component analysis axis one (PC1) sample scores were used to summarize the main patterns of variation in the diatom data using CanoWin v. 5.0 (Ter Braak and Šmilauer 2012). This program was also used on non-transformed diatom relative abundance data to examine changes in diatom species diversity (Hill’s N2; Hill 1973), where N2 represents the number of “very abundant taxa” in a given sample (Birks 2012).

**References**

Birks HJB. 2012 Introduction and overview part II. *In*: Birks HJB, Lotter AF, Juggins S, Smol JP (eds) Volume 5: tracking environmental change using lake sediments: data handling and numerical techniques. Springer, Dordrecht, pp 101–121.

Häkansson H, Kling H. 2011. A light and electron microscope study of previously described and new *Stephanodiscus* species (Bacillariophyceae) from central and northern Canadian lakes, with ecological notes on the species. *Diat. Res.* **4**, 269-288. <https://doi.org/10.1080/0269249X.1989.9705076>

Hill MO. 1973. Diversity and evenness: a unifying notation and its consequences. *Ecol.* **54**, 427–432. (doi:10.2307/1934352)

Krammer K, Lange-Bertalot H. 1986–1991 Bacillariophyceae, parts 1–4. *In*: Subwasserflora von Mitteleuropa. Fischer Verlag, Stuttgart, Germany

ReavieED, Kireta AR. 2015 Centric, Araphid and Eunotioid Diatoms of the Coastal Laurentian Great Lakes. *Bibliotheca Diatomologica* **62**,1-184.

Rühland KM, Smol JP. 2002 Freshwater diatoms from the Canadian arctic treeline and development of paleolimnological inference models. *J. Phycol*. **38**, 249-264.

Tanaka H. 2007 Taxonomic Studies of the Genera *Cyclotella* (Kützing) Brébisson, *Discostella* Houk et Klee and *Puncticulata* Håkansson in the Family Sephanodiscaceae Glezer et Makarova (Bacillariophyta) in Japan. Vol. 53 Stuttgart, J. Cramer.

Tapia PM, Harwood DM. 2002 Upper Cretaceous diatom biostratigraphy of the Arctic Archipelago and northern continental margin, Canada. *Micropaleontol.* **48**, 303–342.

Ter Braak CJF, Šmilauer P. 2012. Canoco reference manual and user’s guide: software for ordination, version 5.0 Microcomputer Power.

**Electronic supplementary material S7**

*Possible reasons why Stephanodiscus oregonicus was not reported in earlier GSL water column surveys*

*Stephanodiscus oregonicus* dominated the earlier sediment intervals in all four of our West Basin diatom records but was not reported in earlier broad phytoplankton water column surveys of the West Basin, GSL (Rawson 1956; Fee et al. 1985). However, this taxon was observed (and photographed) in living material taken from GSL in the 1980s and reported by Häkansson and Kling (2011). It is likely that this taxon was present in earlier surveys but perhaps occurred in too low abundance to be included in the report, or was missed at the time the water column was sampled (i.e. water column was sampled at a very specific point in time that did not correspond to the bloom period). In contrast, each sediment interval in palaeolimnological records integrates diatom taxa that have continually accumulated over several growing seasons (including any past short but intense blooms). Additionally, both Rawson (1956) and Fee et al. (1985) noted difficulty in sampling near the centre of the very large West Basin (where our cores were collected) during the open-water season. Rawson (1956) therefore, chose Gros Cap (closer to the shoreline and the Slave River inflow) to represent the entire West Basin, whereas the West Basin phytoplankton survey by Fee et al. (1985) was represented by just one sample taken on the day immediately following ice-off in June 1983. Therefore, it is plausible that these earlier surveys using spot sampling of the water column (particularly the one-time sample in 1983 by Fee et al. (1985)) may have missed the “spring” maximum plankton growth (more accurately referred to as early summer on GSL by Rawson, given its short ice-free period), when *Stephanodiscus* taxa would be most prolific (Reavie et al. 2014). It is also conceivable that Rawson’s Gros Cap sampling location (that he deemed representative of the open water region of the West Basin) may not be an ideal representation for all West Basin offshore locations and therefore would differ in diatom taxonomic composition. This may explain why our sedimentary records from the central West Basin that integrate seasonal fluctuations in phytoplankton abundances over several seasons, registered a broader diatom community than earlier water column surveys.

**References**

Fee EJ, Stainton MP, Kling HJ. 1985 Primary production and related limnological data for some lakes of the Yellowknife, NWT area. Canadian Technical Report of Fisheries and Aquatic Sciences, 1409: v+ 55 p.

Häkansson H, Kling H. 2011. A light and electron microscope study of previously described and new *Stephanodiscus* species (Bacillariophyceae) from central and northern Canadian lakes, with ecological notes on the species. *Diat. Res.* **4**, 269-288. <https://doi.org/10.1080/0269249X.1989.9705076>

Rawson D S. 1956. The net plankton of Great Slave Lake. *J. Fish. Res. Board Can.* **13**, 53-127.

Reavie ED, Barbiero RP, Allinger LE, Warren GJ. 2014 Phytoplankton trends in the Great Lakes, 2001-2011. *J. Great Lakes Res*. **40**, 618-69.

**Electronic supplementary material S8**

*Did Rawson’s net hauls miss small cyclotelloid taxa?*

It is entirely plausible that Rawson’s 1946-1954 survey of GSL phytoplankton using a #20 silk net (~ 76 µm mesh size) would not have captured very small-celled diatoms such as the cyclotelloid taxa that became prominent around the turn of the 21st century in our sediment records. Fee et al. (1985) noted that “*Rawson did not find any small phytoflagellates in Great Slave Lake but this is unquestionably due to the fact that he used nets to collect samples. It is probable that the flagellates were as abundant in his time as they are now”*. However, with respect to small cyclotelloid taxa, later limnological surveys on the West Basin of GSL by Fee et al. (1985) and Evans (1997) did not use net hauls but rather collected 125 ml water samples preserved in acid Lugol’s solution and then examined samples microscopically using either Utermohl methods or as outlined in Earle et al. (1987). Given that these latter surveys captured algal biomass in the 2-40 µm range (and therefore would have included small-celled centric diatoms), it is likely that the absence of small cyclotelloid taxa in their reports is because these diatoms were not prolific during the period that these earlier surveys were undertaken. In the 1983 survey (Fee et al. 1985), the most dominant phytoplanktonic taxon (by far) was a diatom (78%: *Aulacoseira islandica*), followed by a chrysophyte taxon (9%) and a cryptophyte taxon (7%). According to this 1983 survey, certain taxa were always present in low numbers in Western Basin samples and serve to characterize this phytoplankton community since they were rare or absent in other parts of GSL. These included large centric diatoms such as *Stephanodiscus rotula*, *S. niagarae*, and *Cyclotella comta* (now *Lindavia bodanica*). There was no mention of observing *Discostella stelligera/pseudosetelligera* or small *L. comensis* etc. in their samples. Evans (1997) sampled the West Basin in March 1993 including phytoplankton enumeration and identification (by J.C. Earle (Concordia College, Edmonton). At several stations (including our GSL12 and GSL19) they collected 125 ml samples that were preserved with Lugol’s solution and Defano’s solution. Phytoplankton composition, mean cell size, biomass, and numerical abundance were determined by the methods outlined in Earle et al. (1987). In water column samples taken in at GSL19 in 1993 from the upper 10 m - most algal biomass was in the 2-40 μm size range. Therefore, if the small cyclotelloid taxa observed post-2000 in our 2014 sediment cores had been prolific in 1993, they would have been included in samples collected in the 1990s, but they were not mentioned. In these 1993 samples, *Aulacoseira islandica* was the dominant taxon at the surface. Water sampling in 1993 at site GSL12 (only a 1-m sample collected) found that *Aulacoseira islandica* and *A. distans* were the dominant diatoms at that time. Most algal biomass collected was in the 2-40 μm size range which is within the size range to capture the small cyclotelloid taxa, but these taxa were not observed.

**References**

Earle JC, Duthie HC, Scruton DA. 1987 Factors influencing the distribution of phytoplankton in 97 headwater lakes in insular Newfoundland. *Can. J. Fish. Aquat Sci*. **44,** 639-649.

Evans MS. 1997 Limnological Investigations in the West Basin of Great Slave Lake, March 1994. Northern River Basins Study Project Report No. 131.

Fee EJ, Stainton MP, Kling HJ. 1985 Primary production and related limnological data for some lakes of the Yellowknife, NWT area. Canadian Technical Report of Fisheries and Aquatic Sciences, 1409: v+ 55 p.
